# Supplementary material for: Performance of High-Throughput Sequencing for the Discovery of Genetic Variation Across the Complete Size Spectrum
Source: PubMed Central journal article supplement (PMC3887540; doi:10.1534/g3.113.008797), 2013-11-05
Supplement: supp_g3.113.008797_FigureS2.pdf [file supp_g3.113.008797_FigureS2.pdf]

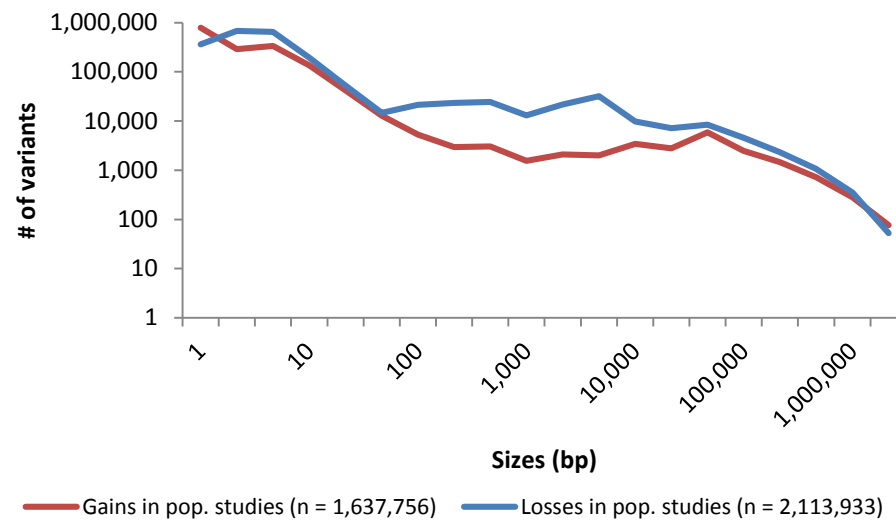

**Figure S2** Size distribution of gains and losses identified in 18 studies that constitute the population reference data set. A summary of the data is also listed in Table S4.
