# Supplementary material for: Performance of High-Throughput Sequencing for the Discovery of Genetic Variation Across the Complete Size Spectrum
Source: PubMed Central journal article supplement (PMC3887540; doi:10.1534/g3.113.008797), 2013-11-05
Supplement: supp_g3.113.008797_FigureS5.pdf [file supp_g3.113.008797_FigureS5.pdf]

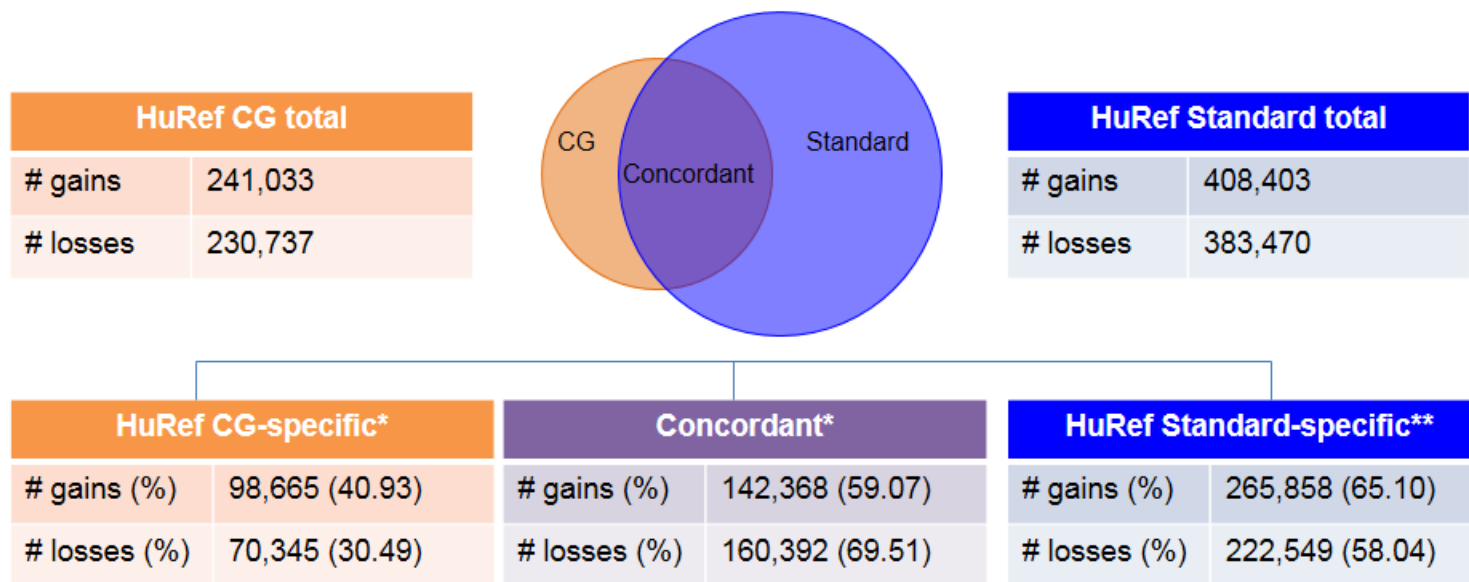

\* Percentage is with respect to HuRef CG total

\*\* Percentage is with respect to HuRef Standard total

**Figure S5** Overall concordance statistics between HuRef Standard and HuRef CG variation sets.
