# Supplementary material for: Performance of High-Throughput Sequencing for the Discovery of Genetic Variation Across the Complete Size Spectrum
Source: PubMed Central journal article supplement (PMC3887540; doi:10.1534/g3.113.008797), 2013-11-05
Supplement: supp_g3.113.008797_FigureS6.pdf [file supp_g3.113.008797_FigureS6.pdf]

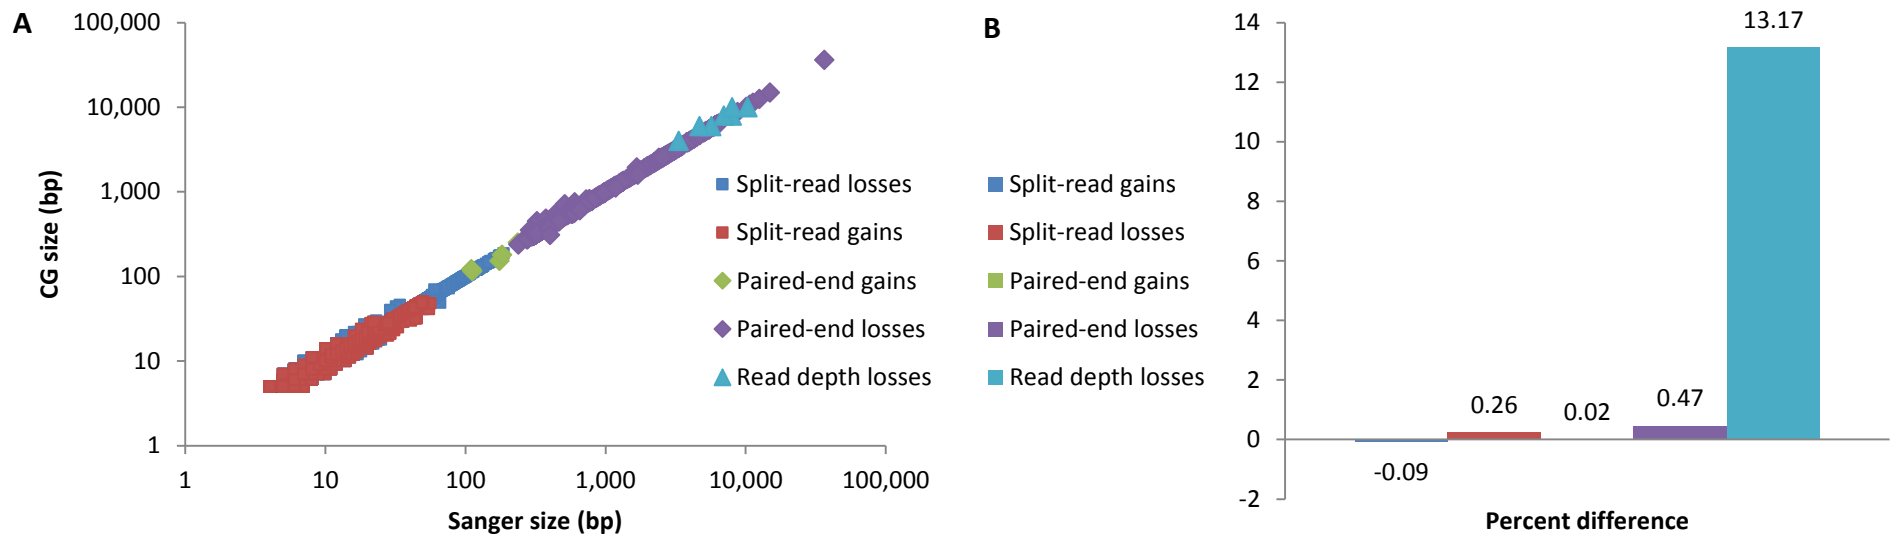

**Figure S6** Complete Genomics variant breakpoint estimation. (A) shows the tight size correlation between HuRef CG variants (> 5bp) and the corresponding breakpoint-refined HuRef Standard variants, and (B) displays the average percentage of size difference between HuRef CG and HuRef Standard.
