# Supplementary material for: Performance of High-Throughput Sequencing for the Discovery of Genetic Variation Across the Complete Size Spectrum
Source: PubMed Central journal article supplement (PMC3887540; doi:10.1534/g3.113.008797), 2013-11-05
Supplement: supp_g3.113.008797_FigureS8.pdf [file supp_g3.113.008797_FigureS8.pdf]

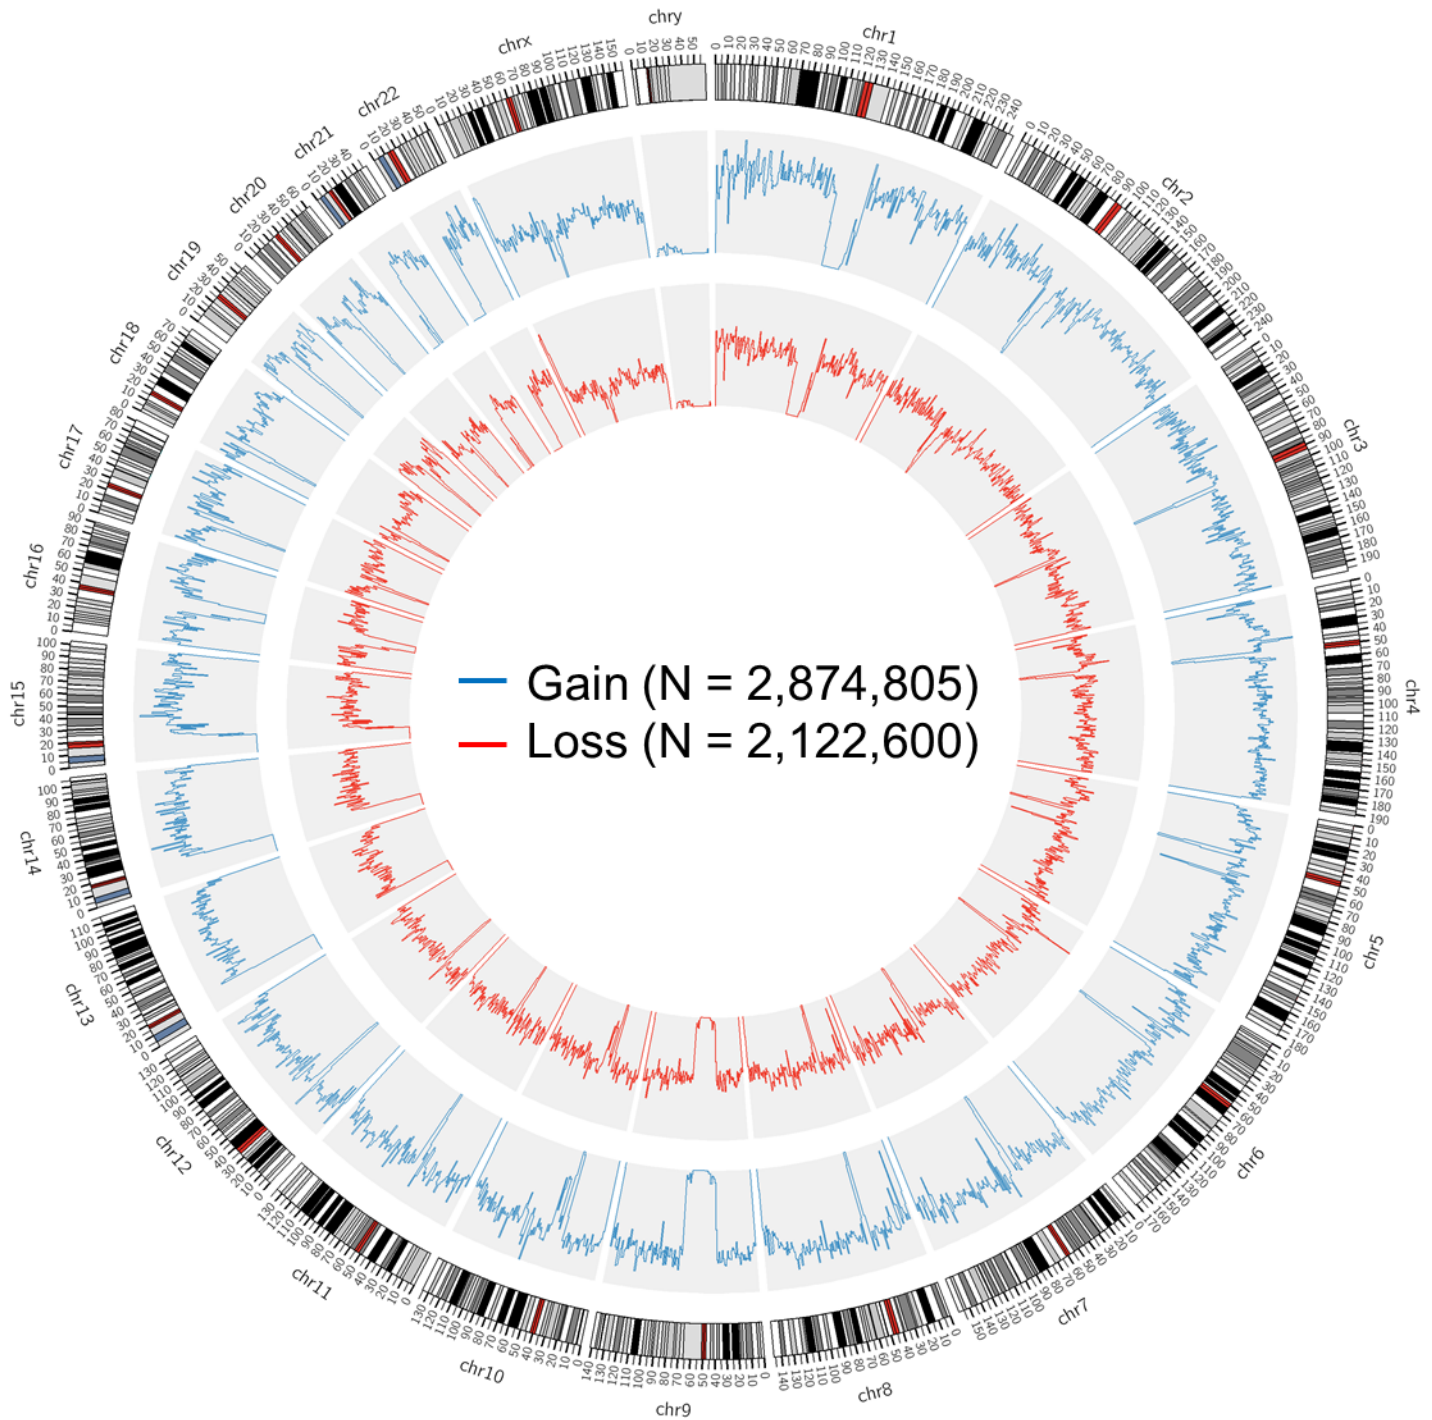

**Figure S8** Density distribution of non-redundant Complete Genomics variants found in our 79-sample cohort along chromosomal locations. The density of gains is presented by the blue track, while losses by the red (number of non-redundant variant per megabase). This provides a snapshot of the distribution of calls along chromosomes. For example, the overall profiles between gain and loss are similar, and the density at repetitive loci (centromeres, telomeres, p-arm of acrocentric chromosomes, chromosome Y) and are notably low. Centromeres are shown in red in the ideogram.
