# Supplementary material for: Performance of High-Throughput Sequencing for the Discovery of Genetic Variation Across the Complete Size Spectrum
Source: PubMed Central journal article supplement (PMC3887540; doi:10.1534/g3.113.008797), 2013-11-05
Supplement: supp_g3.113.008797_FigureS10.pdf [file supp_g3.113.008797_FigureS10.pdf]

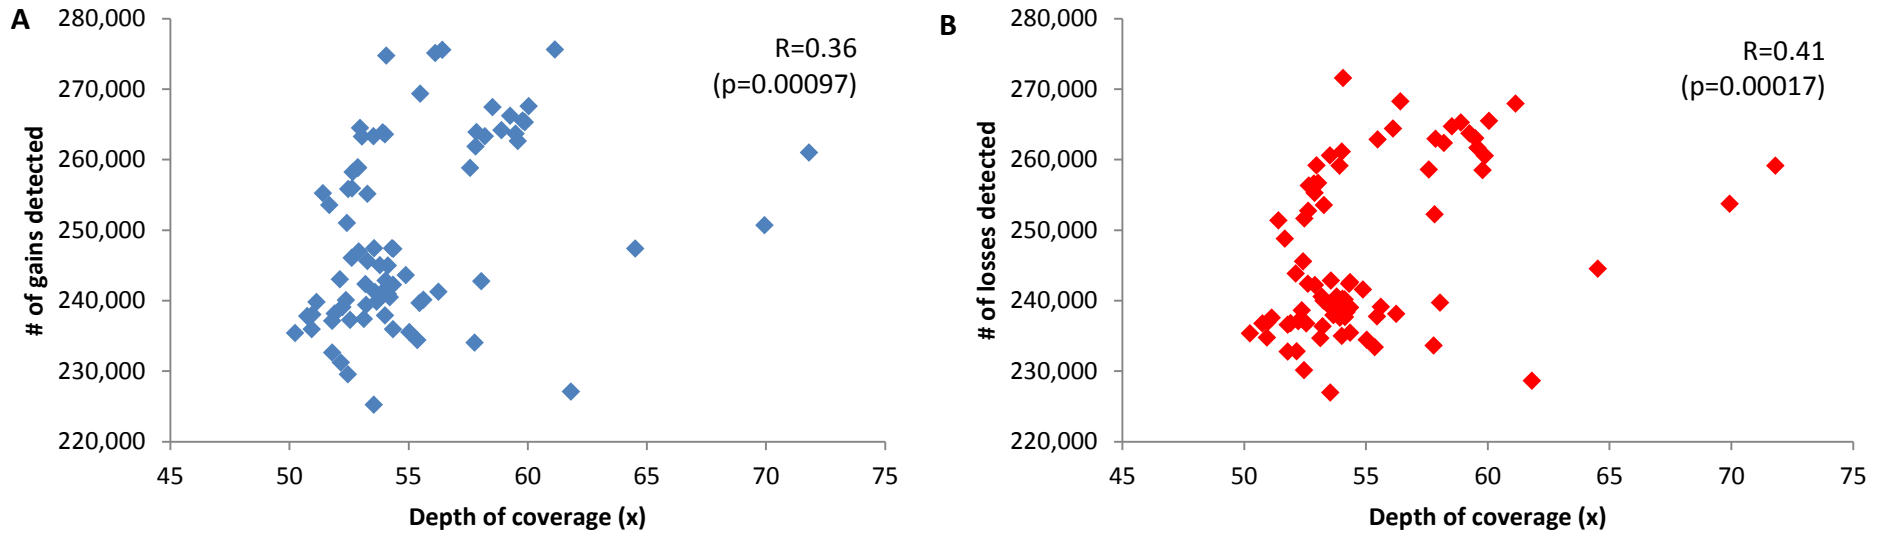

**Figure S10** Positive correlation between the depth of coverage and the number of gains and losses detected among the 80 samples sequenced by CG. (A) Gains. (B) Losses.
